# Supplementary material for: In vitro anticancer activity and SAR studies of triazolyl aminoacyl(peptidyl) penicillins
Source: Royal Society of Chemistry journal article supplement (doi:10.1039/c3md00332a), 2013-12-04
Supplement: c3md00332a.pdf [file c3md00332a.pdf]

Cite this: DOI: 10.1039/c0xx00000x

www.rsc.org/xxxxxx

ARTICLE TYPE

## Supplementary information *In vitro* anticancer activity and SAR of triazolyl aminoacyl(peptidyl) penicillins

Patricia G. Cornier,<sup>a</sup> Carina M. L. Delpiccolo,<sup>a</sup> Florencia Mascali,<sup>a</sup> Dora B. Boggián,<sup>a</sup> Ernesto G. Mata,<sup>a,\*</sup>  
Mariano Cárdenas,<sup>b</sup> Viviana Blank,<sup>b</sup> Leonor P. Roguin<sup>b,\*</sup>

Received (in XXX, XXX) Xth XXXXXXXXXX 20XX, Accepted Xth XXXXXXXXXX 20XX

DOI: 10.1039/b000000x

### Experimental

#### 1. Chemistry

Solvents were analytical grade or were purified by standard procedures prior to use. Infrared spectra (IR) were recorded on a Shimadzu Prestige 21 spectrophotometer and only partial spectral data are listed. The <sup>1</sup>H and <sup>13</sup>C NMR spectra were acquired in the specified solvent, in a Bruker Avance spectrometer (300 and 75 MHz for <sup>1</sup>H and <sup>13</sup>C, respectively), with tetramethylsilane (TMS) as internal standard. The chemical shifts (δ) are reported in ppm downfield from TMS and coupling constants (*J*) are expressed in hertz. The high resolution mass spectra were obtained with a Bruker MicroTOF-Q II instrument (Bruker Daltonics, Billerica, MA). Detection of the ions was performed in electrospray ionization, positive ion mode. Flash column chromatography was performed using Merck silica gel 60 (230-400 mesh). Elution was carried out with hexane-EtOAc mixtures, under positive pressure and employing gradient of solvent polarity techniques.

#### 1.1. (2S)-2-(1-(((2S)-6,6-Dibromo-3,3-dimethyl-7-oxo-4-thia-1-azabicyclo[3.2.0]heptan-2-yl)methyl)-1H-1,2,3-triazole-4-carboxamido)-3-phenylpropanoic acid (6b)

<sup>1</sup>H NMR (CDCl<sub>3</sub>, 300 MHz) δ 1.53 (s, 3H, CH<sub>3</sub>), 1.56 (s, 3H, CH<sub>3</sub>), 3.26 (m, 2H, CH<sub>2</sub>), 4.35 (m, 1H, CH<sub>2</sub>), 4.47 (m, 1H, CH), 4.63 (1m, 1H, CH), 5.00 (m, 1H, CH), 5.63 (s, 1H, CH), 7.16-7.29 (m, 5H, ArH), 7.44 (d, *J*=7.6 Hz, 1H, NH), 8.33 (s, 1H, CH). <sup>13</sup>C NMR (CDCl<sub>3</sub>, 75 MHz) δ 24.4 (CH<sub>3</sub>), 33.2 (CH<sub>3</sub>), 37.4 (CH<sub>2</sub>), 48.3 (CH<sub>2</sub>), 53.4 (CH), 58.6 (C), 63.7 (C), 67.8 (CH), 78.3 (CH), 127.2 (CH), 128.7 (CH), 129.3 (CH), 135.8 (C), 142.6 (C), 160.1 (CO), 165.7 (CO), 173.9 (CO). IR: (film) 1789 cm<sup>-1</sup> (β-lactam), 1740 cm<sup>-1</sup> (CO<sub>2</sub>H), 1670 cm<sup>-1</sup> (CO amide). HRMS-ESI (*m/z*): calcd for C<sub>20</sub>H<sub>21</sub>Br<sub>2</sub>N<sub>5</sub>NaO<sub>4</sub>S [M+Na]<sup>+</sup>: 607.9579; found 607.9573.

#### 1.2. (2S)-2-(1-(((2S)-6,6-Dibromo-3,3-dimethyl-7-oxo-4-thia-1-azabicyclo[3.2.0]heptan-2-yl)methyl)-1H-1,2,3-triazole-4-carboxamido)-3-methylbutanoic acid (6c)

<sup>1</sup>H NMR (CDCl<sub>3</sub>, 300 MHz) δ 1.05 (m, 3H, CH<sub>3</sub>), 1.06 (m, 3H, CH<sub>3</sub>), 1.57 (s, 3H, CH<sub>3</sub>), 1.58 (s, 3H, CH<sub>3</sub>), 2.34 (m, 1H, CH), 4.37-4.50 (m, 2H, CH and CH<sub>2</sub>), 4.66-4.71 (m, 2H, CH and CH<sub>2</sub>), 5.68 (s, 1H, CH), 7.67 (d, 1H, NH, *J*= 8.4 Hz) 8.42 (s, 1H, CH).

<sup>13</sup>C NMR (CDCl<sub>3</sub>, 75 MHz) δ 17.9 (CH<sub>3</sub>), 19.2 (CH<sub>3</sub>), 24.5 (CH<sub>3</sub>), 30.9 (CH), 33.3 (CH<sub>3</sub>), 48.3 (CH<sub>2</sub>), 57.4 (C), 58.6 (CH), 63.7 (C), 67.9 (CH), 78.3 (CH), 126.8 (CH), 142.8(C), 159.9 (CO), 160.3 (CO), 165.7 (CO). IR: (film) 1789 cm<sup>-1</sup> (β-lactam), 1730 cm<sup>-1</sup> (CO<sub>2</sub>H), 1665 cm<sup>-1</sup> (CO amide). HRMS-ESI (*m/z*): calcd for C<sub>16</sub>H<sub>21</sub>Br<sub>2</sub>N<sub>5</sub>NaO<sub>4</sub>S [M+Na]<sup>+</sup>: 559.9579; found 559.95732.

#### 1.3. Methyl 2-(1-(((2S)-6,6-dibromo-3,3-dimethyl-7-oxo-4-thia-1-azabicyclo[3.2.0]heptan-2-yl)methyl)-1H-1,2,3-triazole-4-carboxamido)acetate (7a)

<sup>1</sup>H NMR (CDCl<sub>3</sub>, 300 MHz) δ 1.57 (s, 3H, CH<sub>3</sub>), 1.59 (s, 3H, CH<sub>3</sub>), 3.79 (s, 3H, CH<sub>3</sub>), 4.25 (d, *J*= 5.64 Hz, 2H, CH<sub>2</sub>), 4.37 (m, 1H, CH<sub>2</sub>), 4.42 (m, 1H, CH), 4.70 (dd, *J*<sub>1</sub>= 12.6 Hz, *J*<sub>2</sub>= 3 Hz, 1H, CH<sub>2</sub>), 5.64 (s, 1H, CH), 7.63 (t, *J*= 5.64 Hz, 1H, NH), 8.23 (s, 1H, CH). <sup>13</sup>C NMR (CDCl<sub>3</sub>, 75 MHz) δ 24.5 (CH<sub>3</sub>), 33.2 (CH<sub>3</sub>), 40.9 (CH<sub>2</sub>), 48.3 (CH<sub>2</sub>), 52.5 (CH<sub>3</sub>), 58.5(C), 63.6 (C), 67.9 (CH), 78.4 (CH), 126.1 (CH), 143.1 (C), 159.9 (CO), 165.6 (CO), 169.7 (CO). IR: (film) 1789 cm<sup>-1</sup>(β-lactam), 1747 cm<sup>-1</sup> (CO ester), 1672 cm<sup>-1</sup> (CO amide). HRMS-ESI (*m/z*): calcd. for C<sub>14</sub>H<sub>17</sub>Br<sub>2</sub>N<sub>5</sub>O<sub>4</sub>S [M+Na]<sup>+</sup>: 531.9265; found 531.9260.

#### 1.4. (2S)-Methyl 2-(1-(((2S)-6,6-dibromo-3,3-dimethyl-7-oxo-4-thia-1-azabicyclo[3.2.0]heptan-2-yl)methyl)-1H-1,2,3-triazole-4-carboxamido)-3-methylbutanoate (7c)

<sup>1</sup>H NMR (CDCl<sub>3</sub>, 300 MHz) δ 1.00 (d, *J*= 3.4 Hz, 3H, CH<sub>3</sub>), 1.02 (d, *J*= 3.4 Hz, 3H, CH<sub>3</sub>), 1.57 (s, 3H, CH<sub>3</sub>), 1.59 (s, 3H, CH<sub>3</sub>), 2.28 (m, 1H, CH), 3.77 (s, 3H, OCH<sub>3</sub>), 4.31 (m, 1H, CH<sub>2</sub>), 4.41 (m, 1H, CH), 4.70 (m, 1H, CH<sub>2</sub>), 4.72 (m, 1H, CH), 5.68 (s, 1H, CH), 7.57 (d, *J*= 9Hz, 1H, NH) 8.32 (s, 1H, CH). <sup>13</sup>C NMR (CDCl<sub>3</sub>, 300 MHz) δ 17.9 (CH<sub>3</sub>), 19.1(CH<sub>3</sub>), 24.5 (CH<sub>3</sub>), 31.4 (CH), 33.3 (CH<sub>3</sub>), 48.3 (CH<sub>2</sub>), 52.3 (OCH<sub>3</sub>), 57.1 (CH<sub>3</sub>), 58.6(C), 63.5 (C), 67.9 (CH), 78.4 (CH), 126.4 (CH), 143.2 (C), 159.7 (CO), 165.6 (CO), 171.7 (CO). IR: (film) 1789 cm<sup>-1</sup>(β-lactam), 1745 cm<sup>-1</sup> (CO ester), 1666 cm<sup>-1</sup> (CO amide). HRMS-ESI (*m/z*): calcd for C<sub>15</sub>H<sub>19</sub>Br<sub>2</sub>N<sub>5</sub>NaO<sub>4</sub>S [M+Na]<sup>+</sup>: 573.9735; found 573.9729.

#### 1.5. (2S)-Methyl 2-(1-(((2S)-6,6-dibromo-3,3-dimethyl-7-oxo-4-thia-1-azabicyclo[3.2.0]heptan-2-yl)methyl)-1H-1,2,3-triazole-4-carboxamido)-3-phenylpropanoate (7b)

<sup>1</sup>H NMR (CDCl<sub>3</sub>, 300 MHz) δ 1.57 (s, 3H, CH<sub>3</sub>), 1.59 (s, 3H,

CH<sub>3</sub>), 3.22 (m, 2H, CH<sub>2</sub>), 3.73 (s, 3H, OCH<sub>3</sub>), 4.38 (m, 1H, CH) 4.68 (dd, *J*<sub>1</sub>=12.6 Hz, *J*<sub>2</sub>= 2.7Hz, 2H, CH<sub>2</sub>), 5.05 (m, 1H, CH), 5.64 (s, 1H, CH), 7.16-7.31 (m, 5H, ArH), 7.54 (d, *J*=8.46 Hz, 1H, NH), 8.19 (s, 1H, CH). <sup>13</sup>C NMR (CDCl<sub>3</sub>, 75 MHz) δ 24.5 (CH<sub>3</sub>), 33.2 (CH<sub>3</sub>), 38.2 (CH<sub>2</sub>), 48.3 (CH<sub>2</sub>), 52.4 (CH<sub>3</sub>), 53.2 (CH), 58.5 (C), 63.6 (C), 67.9 (CH), 78.4 (CH), 126.1 (CH), 127.2 (CH), 128.6 (CH), 129.2 (CH), 135.7 (C), 143.0 (C), 159.34 (CO), 165.5 (CO), 171.3 (CO). **IR:** (film) 1789 cm<sup>-1</sup> (β-lactam), 1745 cm<sup>-1</sup> (CO ester), 1672 cm<sup>-1</sup> (CO amide). **HRMS-ESI** (*m/z*): calcd for C<sub>21</sub>H<sub>23</sub>Br<sub>2</sub>N<sub>5</sub>O<sub>4</sub>S [M+H]<sup>+</sup>: 599.9915; found 599.9910.

**1.6. (2S)-Methyl 2-(2-(1-(((2S)-6,6-dibromo-3,3-dimethyl-7-oxo-4-thia-1-azabicyclo[3.2.0]heptan-2-yl)methyl)-1H-1,2,3-triazole-4-carboxamido)acetamido)-3-phenylpropanoate (7d)**  
<sup>1</sup>H NMR (CDCl<sub>3</sub>, 300 MHz) δ 1.57 (s, 3H, CH<sub>3</sub>), 1.60 (s, 3H, CH<sub>3</sub>), 3.11 (ddd, *J*<sub>1</sub>= 21 Hz, *J*<sub>2</sub>= 14 Hz, *J*<sub>3</sub>= 6 Hz, 2H, CH<sub>2</sub>), 3.70 (s, 3H, OCH<sub>3</sub>), 4.11 (d, *J*= 5.7 Hz, 2H, CH<sub>2</sub>), 4.36 (m, 1H, CH<sub>2</sub>), 4.46 (m, 1H, CH), 4.69 (dd, *J*<sub>1</sub>= 13 Hz, *J*<sub>2</sub>= 3.8 Hz, 2H, CH<sub>2</sub>), 4.89 (m, 1H, CH), 5.65 (s, 1H, CH), 6.70 (d, *J*= 7.6 Hz, 1H, NH), 7.07-7.22 (m, 5H, ArH), 7.79 (t, *J*= 5.7 Hz, 1H, NH), 8.25 (s, 1H, CH). <sup>13</sup>C NMR (CDCl<sub>3</sub>, 75 MHz) δ 24.5 (CH<sub>3</sub>), 33.2 (CH<sub>3</sub>), 37.8 (CH<sub>2</sub>), 42.9 (CH<sub>2</sub>), 48.4 (CH<sub>2</sub>), 52.4 (CH<sub>3</sub>), 53.2 (CH), 58.5 (C), 63.6 (C), 67.9 (CH), 78.4 (CH), 126.2 (CH), 127.1 (CH), 128.6 (CH), 129.2 (CH), 135.7 (C), 142.9 (C), 160.2 (CO), 165.6 (CO), 168.14 (CO), 171.8 (CO). **IR:** (film) 1789 cm<sup>-1</sup> (β-lactam), 1745 cm<sup>-1</sup> (CO ester), 1690 cm<sup>-1</sup> (CO amide). **HRMS-ESI** (*m/z*): calcd for C<sub>23</sub>H<sub>26</sub>Br<sub>2</sub>N<sub>6</sub>NaO<sub>5</sub>S [M+Na]<sup>+</sup>: 678.9944; found 678.9943.

**1.7. (2S)-Methyl 2-((2S)-2-(1-(((2S)-6,6-dibromo-3,3-dimethyl-7-oxo-4-thia-1-azabicyclo[3.2.0]heptan-2-yl)methyl)-1H-1,2,3-triazole-4-carboxamido)-4-methylpentanamido)-3-(4-hydroxyphenyl)propanoate (7e)**  
<sup>1</sup>H NMR (CDCl<sub>3</sub>, 300 MHz) δ 0.90 (d, *J*= 6.2 Hz, 3H, CH<sub>3</sub>), 0.93 (d, *J*= 6.2 Hz, 3H, CH<sub>3</sub>), 1.59 (s, 3H, CH<sub>3</sub>), 1.59-1.76 (m, 2H, CH<sub>2</sub>), 1.61 (s, 3H, CH<sub>3</sub>), 2.97 (dd, *J*<sub>1</sub>= 14 Hz, *J*<sub>2</sub>= 6.54 Hz, 1H, CH<sub>2</sub>), 3.10 (dd, *J*<sub>1</sub>= 14 Hz, *J*<sub>2</sub>= 5.4 Hz, 1H, CH<sub>2</sub>), 3.76 (s, 3H, OCH<sub>3</sub>), 4.33 (dd, *J*<sub>1</sub>= 14 Hz, *J*<sub>2</sub>=10.9 Hz, 1H, CH<sub>2</sub>), 4.51 (dd, *J*<sub>1</sub>= 11 Hz, *J*<sub>2</sub>=3.4 Hz, 1H, CH), 4.59-4.67 (m, 1H, CH), 4.74-4.86 (m, 2H, CH and CH<sub>2</sub>), 5.71 (s, 1H, CH), 6.46 (d, *J*= 8.4 Hz, 2H, ArH), 6.76 (d, *J*= 8 Hz, 1H, NH), 6.84 (d, *J*= 8.4 Hz, 2H, ArH), 7.37 (d, *J*= 8.4 Hz, 1H, NH), 8.22 (s, 1H, CH). <sup>13</sup>C NMR (CDCl<sub>3</sub>, 75 MHz) δ 21.9 (CH<sub>3</sub>), 22.9 (CH<sub>3</sub>), 24.7 (CH<sub>3</sub>), 33.2 (CH<sub>3</sub>), 36.5 (CH<sub>2</sub>), 39.9 (CH<sub>2</sub>), 48.4 (CH<sub>2</sub>), 51.1 (CH), 52.5 (CH), 53.0 (CH), 58.0 (C), 63.6 (C), 68.2 (CH), 78.5 (CH), 115.3 (CH), 126.9 (CH), 130.3 (CH), 142.8 (C), 155.0 (C), 159.8 (CO), 166.7 (CO), 170.8 (CO), 171.9 (CO). **IR:** (film) 1789 cm<sup>-1</sup> (β-lactam), 1747 cm<sup>-1</sup> (CO ester), 1670 cm<sup>-1</sup> (CO amide). **HRMS-ESI** (*m/z*): calcd for C<sub>27</sub>H<sub>34</sub>Br<sub>2</sub>N<sub>6</sub>NaO<sub>6</sub>S [M+Na]<sup>+</sup>: 751.05195; found: 751.05135.

**1.8. (2S)-Methyl 2-((2S)-2-(1-(((2S)-6,6-dibromo-3,3-dimethyl-7-oxo-4-thia-1-azabicyclo[3.2.0]heptan-2-yl)methyl)-1H-1,2,3-triazole-4-carboxamido)-4-methylpentanamido)-3-phenylpropanoate (7f)**  
<sup>1</sup>H NMR (CDCl<sub>3</sub>, 300 MHz) δ 0.91 (d, *J*= 5.6 Hz, 3H, CH<sub>3</sub>), 0.92 (d, *J*= 5.6 Hz, 3H, CH<sub>3</sub>), 1.57 (s, 3H, CH<sub>3</sub>), 1.60 (s, 3H,

CH<sub>3</sub>), 1.59-1.76 (m, 3H, CH and CH<sub>2</sub>), 3.04 (dd, *J*<sub>1</sub>= 13.7 Hz, *J*<sub>2</sub>= 6.3 Hz, 1H, CH<sub>2</sub>), 3.14 (dd, *J*<sub>1</sub>= 13.7 Hz, *J*<sub>2</sub>= 5.7 Hz, 1H, CH<sub>2</sub>), 3.69 (s, 3H, OCH<sub>3</sub>), 4.37 (dd, *J*<sub>1</sub>= 13.3 Hz, *J*<sub>2</sub>= 10 Hz, 1H, CH<sub>2</sub>), 4.49 (dd, *J*<sub>1</sub>= 10 Hz, *J*<sub>2</sub>= 3.9, 1H, CH), 4.60 (m, 1H, CH), 4.70 (dd, *J*<sub>1</sub>= 13.3Hz, *J*<sub>2</sub>= 3.9, 1H, CH<sub>2</sub>), 4.87 (m, 1H, CH), 5.66 (s, 1H, CH), 6.75 (d, *J*= 8 Hz, 1H, NH), 7.04-7.15 (m, 5H, ArH), 7.38 (d, *J*= 8.2 Hz, 1H, NH), 8.26 (s, 1H, CH). <sup>13</sup>C NMR (CDCl<sub>3</sub>, 75 MHz) δ 21.9 (CH<sub>3</sub>), 22.9 (CH<sub>3</sub>), 24.5 (CH), 24.6 (CH<sub>3</sub>), 33.3 (CH<sub>3</sub>), 37.9 (CH<sub>2</sub>), 40.7 (CH<sub>2</sub>), 48.4 (CH<sub>2</sub>), 51.3 (CH), 52.3 (CH), 53.2 (CH), 58.5 (C), 63.7 (C), 67.9 (CH), 78.4 (CH), 126.2 (CH), 127.0 (CH), 128.5 (CH), 129.2 (CH), 135.6 (C), 143.0 (C), 159.7 (CO), 165.6 (CO), 171.0 (CO), 171.8 (CO). **IR:** (film) 1797 cm<sup>-1</sup> (β-lactam), 1744 cm<sup>-1</sup> (CO ester), 1670 cm<sup>-1</sup> (CO amide). **HRMS-ESI** (*m/z*): calcd for C<sub>27</sub>H<sub>34</sub>Br<sub>2</sub>N<sub>6</sub>NaO<sub>5</sub>S [M+Na]<sup>+</sup>: 735.05704; found: 735.05518.

**1.9. (2S)-Methyl 2-((2S,3S)-2-(1-(((2S)-6,6-dibromo-3,3-dimethyl-7-oxo-4-thia-1-azabicyclo[3.2.0]heptan-2-yl)methyl)-1H-1,2,3-triazole-4-carboxamido)-3-methylpentanamido)-3-phenylpropanoate (7h)**  
<sup>1</sup>H NMR (CDCl<sub>3</sub>, 300 MHz) δ 0.86 (t, *J*=7.2 Hz, 3H, CH<sub>3</sub>), 0.93 (d, *J*= 6.6 Hz, 3H, CH<sub>3</sub>), 1.13 (m, 1H, CH<sub>2</sub>), 1.48 (m, 1H, CH<sub>2</sub>), 1.55 (s, 3H, CH<sub>3</sub>), 1.57 (s, 3H, CH<sub>3</sub>), 1.96 (m, 1H, CH), 3.05 (dd, *J*<sub>1</sub>= 13.8 Hz, *J*<sub>2</sub>= 6.3, 1H, CH<sub>2</sub>), 3.13 (dd, *J*<sub>1</sub>= 13.8 Hz, *J*<sub>2</sub>= 5.9, 1H, CH<sub>2</sub>), 3.68 (s, 3H, OCH<sub>3</sub>), 4.39 (m, 1H, CH<sub>2</sub>), 4.51 (m, 2H, CH), 4.73 (m, 1H, CH<sub>2</sub>), 4.90 (m, 1H, CH), 5.66 (s, 1H, CH), 6.72 (d, *J*= 8 Hz, 1H, NH), 7.06-7.21 (m, H, ArH), 7.57 (d, *J*= 9.2 Hz, 1H, NH), 8.35 (m, 1H, CH). <sup>13</sup>C NMR (CDCl<sub>3</sub>, 75 MHz) δ 11.1 (CH<sub>3</sub>), 15.5 (CH<sub>3</sub>), 24.5 (CH<sub>3</sub>), 24.8 (CH<sub>2</sub>), 33.1 (CH<sub>3</sub>), 37.2 (CH), 38.0 (CH<sub>2</sub>), 48.3 (CH<sub>2</sub>), 52.4 (OCH<sub>3</sub>), 53.1 (CH), 57.4 (CH), 58.2 (C), 63.7 (C), 67.7 (CH), 78.4 (CH), 126.2 (CH), 127.0 (C), 128.5 (CH), 129.2 (CH), 135.6 (CH), 143.2 (C), 159.6 (CO), 165.5 (CO), 170.3 (CO), 171.9 (CO). **IR:** (film) 1795 cm<sup>-1</sup> (β-lactam), 1745 cm<sup>-1</sup> (CO ester), 1643 cm<sup>-1</sup> (CO amide). **HRMS-ESI** (*m/z*): calcd for C<sub>27</sub>H<sub>34</sub>Br<sub>2</sub>KN<sub>6</sub>O<sub>5</sub>S [M+K]<sup>+</sup>: 751.03097; found: 751.02874.

**1.10. (2S)-Methyl 2-((2S)-2-(1-(((2S)-6,6-dibromo-3,3-dimethyl-7-oxo-4-thia-1-azabicyclo[3.2.0]heptan-2-yl)methyl)-1H-1,2,3-triazole-4-carboxamido)-3-methylbutanamido)-3-phenylpropanoate (7i)**  
<sup>1</sup>H NMR (CDCl<sub>3</sub>, 300 MHz) δ 0.94 (t, *J*= 7.2 Hz, 6H, CH<sub>3</sub>), 1.55 (s, 3H, CH<sub>3</sub>), 1.59 (s, 3H, CH<sub>3</sub>), 2.19 (m, 1H, CH), 3.05 (dd, *J*<sub>1</sub>= 14 Hz, *J*<sub>2</sub>= 6.5Hz, 1H, CH<sub>2</sub>), 3.12 (dd, *J*<sub>1</sub>= 14 Hz, *J*<sub>2</sub>= 6 Hz, 1H, CH<sub>2</sub>), 3.68 (s, 3H, OCH<sub>3</sub>), 4.37 (dd, *J*<sub>1</sub>= 13.4 Hz, *J*<sub>2</sub>= 10.3 Hz, 1H, CH<sub>2</sub>), 4.52 (m, 1H, CH), 4.53 (m, 1H, CH), 4.71 (dd, *J*<sub>1</sub>= 13.4 Hz, *J*<sub>2</sub>= 4.2 Hz, 1H, CH<sub>2</sub>), 4.91 (m, 1H, CH), 5.66 (s, 1H, CH), 6.79 (d, *J*= 8 Hz, 1H, NH), 7.07-7.18 (m, 5H, ArH), 7.60 (d, *J*= 9 Hz, 1H, NH), 8.36 (s, 1H, CH). <sup>13</sup>C NMR (CDCl<sub>3</sub>, 75 MHz) δ 18.0 (CH<sub>3</sub>), 19.2 (CH<sub>3</sub>), 24.4 (CH<sub>3</sub>), 31.1 (CH), 33.2 (CH<sub>3</sub>), 38.0 (CH<sub>2</sub>), 48.4 (CH<sub>2</sub>), 52.3 (OCH<sub>3</sub>), 53.1 (CH), 58.1 (CH), 58.6 (C), 63.7 (C), 67.7 (CH), 78.4 (CH), 126.3 (CH), 127.1 (CH), 128.5 (CH), 129.2 (CH), 135.6 (C), 143.2 (C), 159.7 (CO), 165.6 (CO), 170.3 (CO), 171.8 (CO). **IR:** (film) 1789 cm<sup>-1</sup> (β-lactam), 1737 cm<sup>-1</sup> (CO ester), 1645 cm<sup>-1</sup> (CO amide). **HRMS-ESI** (*m/z*): calcd for C<sub>26</sub>H<sub>32</sub>Br<sub>2</sub>N<sub>6</sub>NaO<sub>5</sub>S [M+Na]<sup>+</sup>: 721.04139; found: 721.04279.

**1.11. (2S)-Methyl 2-((2S)-1-(1-(((2S)-6,6-dibromo-3,3-dimethyl-7-oxo-4-thia-1-azabicyclo[3.2.0]heptan-2-yl)methyl)-1H-1,2,3-triazole-4-carboxamido)pyrrolidine-2-carboxamido)-3-phenylpropanoate (7j).**

<sup>1</sup>H NMR (CDCl<sub>3</sub>, 300 MHz) δ 1.58 (s, 3H, CH<sub>3</sub>), 1.60 (s, 3H, CH<sub>3</sub>), 1.9 (m, 2H, CH<sub>2</sub>), 2.32 (m, 2H, CH<sub>2</sub>), 2.91-3.20 (m, 2H, CH<sub>2</sub>), 3.70 (s, 3H, OCH<sub>3</sub>), 3.73 (m, 2H, CH<sub>2</sub>), 4.07 (m, 2H, CH<sub>2</sub>), 4.40 (m, 1H, CH), 4.44 (m, 1H, CH<sub>2</sub>), 4.67 (m, 1H, CH<sub>2</sub>), 4.76 (m, 1H, CH), 4.85 (m, 1H, CH), 5.64 (s, 1H, CH), 6.90 (m, 1H, NH), 7.06-7.22 (m, 5H, ArH), 7.45 (t, *J*=8 Hz, 1H, NH), 8.25 (s, 1H, CH). <sup>13</sup>C NMR (CDCl<sub>3</sub>, 75 MHz) δ 24.2 (CH<sub>3</sub>), 24.4 (CH<sub>2</sub>), 25.1 (CH<sub>2</sub>), 25.5 (CH<sub>2</sub>), 33.2 (CH<sub>3</sub>), 37.9 (CH<sub>2</sub>), 48.1 (CH<sub>2</sub>), 49.3 (CH<sub>2</sub>), 52.2 (OCH<sub>3</sub>), 53.1 (CH), 58.5 (C), 60.8 (CH), 63.6 (C), 67.9 (CH), 78.4 (CH), 114.4 (C), 126.8 (CH), 128.2 (CH), 128.4 (CH), 128.7 (CH), 129.1 (CH), 135.9 (C), 144.5 (C), 149.9 (C), 165.5 (CO), 168.4 (CO), 170.5 (CO), 171.9 (CO). IR: (film) 1789 cm<sup>-1</sup> (β-lactam), 1745 cm<sup>-1</sup> (CO ester), 1681 cm<sup>-1</sup> (CO amide). HRMS-ESI (*m/z*): calcd for C<sub>26</sub>H<sub>30</sub>Br<sub>2</sub>KN<sub>6</sub>O<sub>5</sub>S [M+K]<sup>+</sup>: 734.99967; found 734.99935.

**1.12. (2S)-Methyl 2-((2S)-2-(1-(((2S)-6,6-dibromo-3,3-dimethyl-7-oxo-4-thia-1-azabicyclo[3.2.0]heptan-2-yl)methyl)-1H-1,2,3-triazole-4-carboxamido)-4-methylpentanamido)-4-methylpentanoate (7k).**

<sup>1</sup>H NMR (CDCl<sub>3</sub>, 300 MHz) δ 0.82-0.97 (m, 12 H, CH<sub>3</sub>), 1.55 (s, 3H, CH<sub>3</sub>), 1.58 (s, 3H, CH<sub>3</sub>), 1.50-1.80 (m, 4H, CH<sub>2</sub>), 1.63-1.81 (m, 2H, 2CH), 3.72 (s, 3H, OCH<sub>3</sub>), 4.35 (dd, *J*<sub>1</sub>= 13.7 Hz, *J*<sub>2</sub>=10 Hz, 1H, CH<sub>2</sub>), 4.49 (dd, *J*<sub>1</sub>= 10 Hz, *J*<sub>2</sub>= 3.9 Hz, 1H, CH), 4.60 (m, 1H, CH), 4.68-4.72 (m, 2H, CH and CH<sub>2</sub>), 5.65 (s, 1H, CH), 6.80 (d, *J*= 8 Hz, 1H, NH), 7.49 (d, *J*= 8.4 Hz, 1H, NH), 8.32 (m, 1H, CH). <sup>13</sup>C NMR (CDCl<sub>3</sub>, 75 MHz) δ 21.9 (CH<sub>3</sub>), 22.0 (CH<sub>3</sub>), 22.6 (CH<sub>3</sub>), 22.8 (CH<sub>3</sub>), 24.5 (CH<sub>3</sub>), 24.7 (CH), 24.8 (CH), 33.2 (CH<sub>3</sub>), 41.1 (CH<sub>2</sub>), 41.4 (CH<sub>2</sub>), 48.4 (CH<sub>2</sub>), 50.7 (CH), 51.3 (CH), 52.4 (OCH<sub>3</sub>), 58.5 (C), 63.7 (C), 67.8 (CH), 78.4 (CH), 126.2 (CH), 143.1 (C), 159.7 (CO), 165.6 (CO), 171.3 (CO), 173.3 (CO). IR: (film) 1789 cm<sup>-1</sup> (β-lactam), 1745 cm<sup>-1</sup> (CO ester), 1651 cm<sup>-1</sup> (CO amide). HRMS-ESI (*m/z*): calcd for C<sub>24</sub>H<sub>37</sub>Br<sub>2</sub>N<sub>6</sub>O<sub>5</sub>S [M+H]<sup>+</sup>: 679.09074; found: 679.08736.

**1.13. (2S)-Methyl 2-((2S,3S)-2-(1-(((2S)-6,6-dibromo-3,3-dimethyl-7-oxo-4-thia-1-azabicyclo[3.2.0]heptan-2-yl)methyl)-1H-1,2,3-triazole-4-carboxamido)-3-methylpentanamido)-3-(4-hydroxyphenyl)propanoate (7l).**

<sup>1</sup>H NMR (CDCl<sub>3</sub>, 300 MHz) δ 0.92 (d, *J*= 6.2 Hz 3H, CH<sub>3</sub>), 0.93 (d, *J*= 6.2, 3H, CH<sub>3</sub>), 1.59 (s, 3H, CH<sub>3</sub>), 1.59-1.76 (m, 2H, CH<sub>2</sub>), 1.61 (s, 3H, CH<sub>3</sub>), 2.91-3.16 (m, 2H, CH<sub>2</sub>), 3.76 (s, 3H, CH<sub>3</sub>), 4.33 (m, 1H, CH<sub>2</sub>), 4.51 (m, 1H, CH), 4.62 (m, 1H, CH), 4.80 (m, 1H, CH), 5.71 (s, 1H, CH), 6.44-6.85 (m, ArH), 6.76 (d, *J*= 8 Hz, 1H, NH), 7.37 (d, *J*= 8.4 Hz, 1H, NH), 8.22 (s, 1H, CH). <sup>13</sup>C NMR (CDCl<sub>3</sub>, 75 MHz) δ 21.9 (CH<sub>3</sub>), 22.9 (CH<sub>3</sub>), 24.7 (CH<sub>3</sub>), 33.2 (CH<sub>3</sub>), 36.5 (CH<sub>2</sub>), 39.9 (CH<sub>2</sub>), 48.4 (CH<sub>2</sub>), 51.1 (CH), 52.5 (CH), 53.0 (CH), 58.0 (C), 63.6 (C), 68.2 (CH), 78.5 (CH), 115.3 (CH), 126.9 (CH), 130.3 (CH), 142.8 (C), 155.0 (C), 159.8 (CO), 166.7 (CO), 170.8 (CO), 171.9 (CO). IR: (film) 1789 cm<sup>-1</sup> (β-lactam), 1745 cm<sup>-1</sup> (CO ester), 1645 cm<sup>-1</sup> (CO amide). HRMS-ESI (*m/z*): calcd for C<sub>27</sub>H<sub>35</sub>Br<sub>2</sub>N<sub>6</sub>O<sub>6</sub>S [M+H]<sup>+</sup>: 729.0700; found: 729.06992.

**1.14. (2S)-Methyl 2-((2S)-2-(1-(((2S,6S)-6-bromo-3,3-dimethyl-7-oxo-4-thia-1-azabicyclo[3.2.0]heptan-2-yl)methyl)-1H-1,2,3-triazole-4-carboxamido)-4-(methylthio)butanamido)-3-phenylpropanoate (7m).**

<sup>1</sup>H NMR (CDCl<sub>3</sub>, 300 MHz) δ 1.58 (s, 3H, CH<sub>3</sub>), 1.61 (s, 3H, CH<sub>3</sub>), 2.06 (s, 3H, CH<sub>3</sub>), 2.00-2.23 (m, 2H, CH<sub>2</sub>), 2.58 (t, *J*= 7 Hz, 2H, CH<sub>2</sub>), 3.07 (dd, *J*<sub>1</sub>= 13.8 Hz, *J*<sub>2</sub>= 6.2 Hz, 1H, CH<sub>2</sub>), 3.16 (dd, *J*<sub>1</sub>= 14 Hz, *J*<sub>2</sub>= 6.2 Hz, 1H, CH<sub>2</sub>), 3.69 (s, 3H, OCH<sub>3</sub>), 4.37 (dd, *J*<sub>1</sub>= 14 Hz, *J*<sub>2</sub>= 5.4 Hz, 1H, CH<sub>2</sub>), 3.71 (s, 3H, OCH<sub>3</sub>), 4.33-4.49 (m, 2H, CH and CH<sub>2</sub>), 4.76-4.83 (m, 1H, CH), 4.85-4.92 (m, 1H, CH), 5.65 (s, 1H, CH), 6.78 (d, *J*= 8 Hz, 1H, NH), 7.07-7.22 (m, 5H, ArH), 7.67 (d, *J*= 8 Hz, 1H, NH), 8.19 (s, 1H, CH). <sup>13</sup>C NMR (CDCl<sub>3</sub>, 75 MHz) δ 15.0 (CH<sub>3</sub>), 24.5 (CH<sub>3</sub>), 30.0 (CH<sub>2</sub>), 31.1 (CH<sub>2</sub>), 33.2 (CH<sub>3</sub>), 37.8 (CH<sub>2</sub>), 48.4 (CH<sub>2</sub>), 51.6 (CH), 52.4 (OCH<sub>3</sub>), 53.2 (CH), 58.5 (C), 63.6 (C), 67.9 (CH), 78.5 (CH), 126.0 (CH), 127.2 (CH), 128.6 (CH), 129.2 (CH), 135.5 (C), 143.1 (C), 159.6 (CO), 165.6 (CO), 170.1 (CO), 171.6 (CO). IR: (film) 1789 cm<sup>-1</sup> (β-lactam), 1741 cm<sup>-1</sup> (CO ester), 1651 cm<sup>-1</sup> (CO amide). HRMS-ESI (*m/z*): calcd for C<sub>26</sub>H<sub>32</sub>Br<sub>2</sub>N<sub>6</sub>NaO<sub>5</sub>S<sub>2</sub> [M+Na]<sup>+</sup>: 753.0140; found: 753.01346.

**1.15. (2S)-Methyl 2-(1-(((2S)-6,6-dibromo-3,3-dimethyl-7-oxo-4-thia-1-azabicyclo[3.2.0]heptan-2-yl)methyl)-1H-1,2,3-triazole-4-carboxamido)-4-methylpentanoate (7n).**

<sup>1</sup>H NMR (CDCl<sub>3</sub>, 300 MHz) δ 0.96 (s, 3H, CH<sub>3</sub>), 0.98 (s, 3H, CH<sub>3</sub>), 1.57 (s, 3H, CH<sub>3</sub>), 1.59 (s, 3H, CH<sub>3</sub>), 1.67-1.80 (m, 3H, CH and CH<sub>2</sub>), 3.76 (s, 3H, OCH<sub>3</sub>), 4.33-4.46 (m, 2H, CH and CH<sub>2</sub>), 4.64-4.71 (m, 1H, CH<sub>2</sub>), 4.78-4.86 (m, 1H, CH), 5.7 (s, 1H, CH), 7.46 (d, *J*= 8.6 Hz, 1H, NH), 8.35 (s, 1H, CH). <sup>13</sup>C NMR (CDCl<sub>3</sub>, 75 MHz) δ 21.8 (CH<sub>3</sub>), 22.8 (CH<sub>3</sub>), 24.5 (CH), 24.8 (CH<sub>3</sub>), 33.3 (CH<sub>3</sub>), 41.5 (CH<sub>2</sub>), 48.2 (CH<sub>2</sub>), 50.5 (CH), 52.4 (OCH<sub>3</sub>), 58.6 (C), 63.5 (C), 67.9 (CH), 78.4 (CH), 126.4 (CH), 143.1 (C), 159.6 (CO), 165.6 (CO), 172.7 (CO). IR: (film) 1791 cm<sup>-1</sup> (β-lactam), 1735 cm<sup>-1</sup> (CO ester), 1649 cm<sup>-1</sup> (CO amide). HRMS-ESI (*m/z*): calcd for C<sub>18</sub>H<sub>26</sub>Br<sub>2</sub>N<sub>5</sub>O<sub>4</sub>S [M+H]<sup>+</sup>: 566.0072; found: 566.00711.

**1.16. (2S)-Methyl 2-(1-(((2S)-6,6-dibromo-3,3-dimethyl-7-oxo-4-thia-1-azabicyclo[3.2.0]heptan-2-yl)methyl)-1H-1,2,3-triazole-4-carboxamido)-3-(4-hydroxyphenyl)propanoate (7o).**

<sup>1</sup>H NMR (CDCl<sub>3</sub>, 300 MHz) δ 1.56 (s, 3H, CH<sub>3</sub>), 1.58 (s, 3H, CH<sub>3</sub>), 3.12 (m, 2H, CH<sub>2</sub>), 3.75 (s, 3H, OCH<sub>3</sub>), 4.36 (m, 1H, CH<sub>2</sub>), 4.38 (m, 1H), 4.65 (q, *J*= 11 Hz, 1H, CH<sub>2</sub>), 5.01 (m, 1H, CH), 5.62 (s, 1H, CH), 6.69-7.04 (m, 4H, ArH), 7.53 (d, *J*= 8.6 Hz, 1H, NH), 8.09 (s, 1H, CH). <sup>13</sup>C NMR (CDCl<sub>3</sub>, 75 MHz) δ 24.5 (CH<sub>3</sub>), 33.2 (CH<sub>3</sub>), 37.6 (CH<sub>2</sub>), 48.3 (CH<sub>2</sub>), 52.4 (CH<sub>3</sub>), 53.3 (CH), 58.4 (C), 63.6 (C), 67.9 (CH), 78.4 (CH), 115.5 (CH), 126.1 (CH), 127.4 (C), 130.4 (CH), 143.0 (C), 155.0 (C), 159.34 (CO), 165.5 (CO), 171.3 (CO). IR: (film) 1795 cm<sup>-1</sup> (β-lactam), 1745 cm<sup>-1</sup> (CO ester), 1655 cm<sup>-1</sup> (CO amide). HRMS-ESI (*m/z*): calcd for C<sub>21</sub>H<sub>23</sub>Br<sub>2</sub>N<sub>5</sub>NaO<sub>5</sub>S [M+Na]<sup>+</sup>: 637.9684; found: 637.9678.

**1.17. (2S)-Methyl 2-((2S)-2-(1-(((2S)-3,3-dimethyl-7-oxo-4-thia-1-azabicyclo[3.2.0]heptan-2-yl)methyl)-1H-1,2,3-triazole-4-carboxamido)-4-methylpentanamido)-3-phenylpropanoate (7p).**

<sup>1</sup>H NMR (CDCl<sub>3</sub>, 300 MHz) δ 0.91 (d, *J*= 5.7 Hz, 3H, CH<sub>3</sub>), 0.92 (d, *J*= 5.7 Hz, 3H, CH<sub>3</sub>), 1.59 (s, 6H, 2 CH<sub>3</sub>), 1.65-1.77 (m, 3H, CH and CH<sub>2</sub>), 3.01-3.18 (m, 2H, CH<sub>2</sub>), 3.06-3.13 (m, 1H, CH<sub>2</sub>), 3.53 (dd, *J*<sub>1</sub>= 16 Hz, *J*<sub>2</sub>= 4.3 Hz, 1H, CH<sub>2</sub>), 3.69 (s, 3H, OCH<sub>3</sub>), 4.31-4.33 (m, 2H, CH and CH<sub>2</sub>), 4.57-4.69 (m, 2H, CH and CH<sub>2</sub>), 4.82-4.89 (m, 1H, CH), 5.16 (dd, *J*<sub>1</sub>= 4 Hz, *J*<sub>2</sub>= 2 Hz, 1H, CH), 6.73 (d, *J*= 7.6 Hz, 1H, NH), 7.05-7.11 (m, 5H, ArH), 7.35 (d, *J*= 8.3 Hz, 1H, NH), 8.19 (s, 1H, CH). <sup>13</sup>C NMR (CDCl<sub>3</sub>, 75 MHz) δ 21.8 (CH<sub>3</sub>), 22.9 (CH<sub>3</sub>), 24.6 (CH), 24.9 (CH<sub>3</sub>), 33.0 (CH<sub>3</sub>), 37.9 (CH<sub>2</sub>), 40.5 (CH<sub>2</sub>), 48.1 (CH<sub>2</sub>), 49.07 (CH), 51.3 (CH), 52.3 (OCH<sub>3</sub>), 53.2 (CH), 58.9 (CH), 63.7 (C), 68.1 (CH), 126.2 (CH), 127.0 (CH), 128.4 (CH), 129.2 (CH), 135.7 (C), 142.8 (C), 159.9 (CO), 171.0 (CO), 171.7 (CO), 173.2 (CO). IR: (film) 1776 cm<sup>-1</sup> (β-lactam), 1745 cm<sup>-1</sup> (CO ester), 1658 cm<sup>-1</sup> (CO amide). HRMS-ESI (*m/z*): calcd for C<sub>27</sub>H<sub>37</sub>N<sub>6</sub>O<sub>5</sub>S [M+H]<sup>+</sup>: 557,2546; found: 557.25376.

**1.18. (2S)-Methyl 2-((2S)-2-(1-(((2S)-6,6-dibromo-3,3-dimethyl-4,4-dioxido-7-oxo-4-thia-1-azabicyclo[3.2.0]heptan-2-yl)methyl)-1H-1,2,3-triazole-4-carboxamido)-4-methylpentanamido)-3-phenylpropanoate (7q).**

<sup>1</sup>H NMR (CDCl<sub>3</sub>, 300 MHz) δ 0.88 (d, *J*= 6 Hz, 3H, CH<sub>3</sub>), 0.90 (d, *J*= 6 Hz, 3H, CH<sub>3</sub>), 1.44 (s, 3H, CH<sub>3</sub>), 1.58 (s, 3H, CH<sub>3</sub>), 1.61-1.76 (m, 3H, CH and CH<sub>2</sub>), 3.01-3.18 (m, 2H, CH<sub>2</sub>), 3.05 (dd, *J*<sub>1</sub>= 13.8 Hz, *J*<sub>2</sub>= 6.3 Hz, 1H, CH<sub>2</sub>), 3.13 (dd, *J*<sub>1</sub>= 13.8 Hz, *J*<sub>2</sub>= 5.9 Hz, 1H, CH<sub>2</sub>), 3.68 (s, 3H, OCH<sub>3</sub>), 3.52 (m, 1H, CH), 3.60-3.70 (m, 2H, CH<sub>2</sub>), 4.70-4.78 (m, 1H, CH), 4.88 (m, 1H, CH), 5.16 (s, 1H, CH), 7.02 (d, *J*= 8.2 Hz, 1H, NH), 7.05-7.15 (m, 5H), 7.53 (d, *J*= 8.6 Hz, 1H, NH), 8.17 (s, 1H, CH). <sup>13</sup>C NMR (CDCl<sub>3</sub>, 75 MHz) δ 18.2 (CH<sub>3</sub>), 19.8 (CH<sub>3</sub>), 22.0 (CH<sub>3</sub>), 22.8 (CH<sub>3</sub>), 24.7 (CH), 37.9 (CH<sub>2</sub>), 41.1 (CH<sub>2</sub>), 44.8 (C), 49.1 (CH<sub>2</sub>), 51.4 (CH), 52.4 (OCH<sub>3</sub>), 53.3 (CH), 62.1 (CH), 64.5 (C), 74.0 (CH), 127.0 (CH), 127.3 (CH), 128.4 (CH), 129.2 (CH), 135.7 (C), 143.1 (C), 159.8 (CO), 165.2 (CO), 171.2 (CO), 171.9 (CO). IR: (film) 1807 cm<sup>-1</sup> (β-lactam), 1745 cm<sup>-1</sup> (CO ester), 1643 cm<sup>-1</sup> (CO amide), 1336 and 1128 (sulfone). HRMS-ESI (*m/z*): calcd for C<sub>27</sub>H<sub>34</sub>Br<sub>2</sub>N<sub>6</sub>NaO<sub>7</sub>S [M+Na]<sup>+</sup>: 767,0474; 7 found: 67.04602.

## 2. Anticancer screening

### 2.1 Cell lines and culture conditions

HeLa (ATCC CCL-2) cells were grown in minimum essential medium (MEM) supplemented with 10% fetal bovine serum (FBS), 2 mM L-glutamine, 50 U/mL penicillin and 50 μg/mL streptomycin. B16-F0 cell line, kindly provided by the Laboratory of Molecular Oncology (Quilmes National University, Buenos Aires, Argentina), was grown in RPMI-1640 supplemented as indicated above. NMuMG (ATCC CRL-1636) cells, gently provided by the Institute of Oncology Angel H. Roffo (Buenos Aires, Argentina), were cultured in DMEM-F12 containing 10% FBS, 2 mM L-glutamine, 0.6% HEPES, 50 U/mL penicillin and 50 μg/mL streptomycin.

### 2.2 Cell proliferation assay

Cells were placed in 96-well microplates at a density of 2 x 10<sup>4</sup> cells/well (HeLa and NMuMG) or 1 x 10<sup>4</sup> cells/well (B16-F0) and incubated for 72 h at 37 °C in the presence or absence of 20 μM of the different compounds in a total volume of 0.2 ml of culture medium. Compounds were dissolved in dimethylsulfoxide (DMSO) as 10 mM stock solutions and stored at -70 °C. Prior to

use, the compounds were diluted 1:10 in ethanol and added at the indicated concentrations to the culture medium. Control cells were treated under similar conditions and a final concentration of 20 μL vehicle/mL of culture medium was used in all experiments. Total cell number was evaluated by colorimetric determination of hexosaminidase levels, a ubiquitous lysosomal enzyme.<sup>1</sup> Briefly, cells were washed twice with phosphate-buffered saline and then incubated at 37 °C with 60 μL of 3.25 mM *p*-nitrophenol-*N*-acetyl-β-D-glucosaminide dissolved in 50 mM citrate buffer, pH 5, 0.25% Triton X-100. After 45-120 min, the color reaction was developed and the enzyme activity was blocked by adding 90 μL of 50 mM glycine buffer, pH 10.4, containing 5 mM EDTA. Absorbance values were measured at 405 nm in a visible plate reader (Biotrak II, Amersham Biosciences, USA). The molar drug concentrations required to cause 50% growth inhibition (IC<sub>50</sub>) were determined from dose-response curves.

75 .

## Notes and references

- 1 a) U. Landegren, *J. Immunol. Methods*, 1984, **67**, 379-388. b) M. Cárdenas, M. Marder, V.C. Blank, L.P. Roguin, *Bioorg. Med. Chem.*, 2006, **14**, 2966-2971.
